# Supplementary material for: A 1100-year multi-proxy palaeoenvironmental record from Lake Höglwörth, Bavaria, Germany
Source: Copernicus journal article supplement (doi:10.5194/egqsj-72-219-2023), 2023-11-14
Supplement: Supplementary file 2 [file egqsj-72-219-2023-supplement.zip]

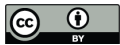

*Supplement of*

## **A 1100-year multi-proxy palaeoenvironmental record from Lake Höglwörth, Bavaria, Germany**

**Sudip Acharya et al.**

*Correspondence to:* Sudip Acharya ([sudip.acharya@uni-jena.de](mailto:sudip.acharya@uni-jena.de))

- [egqsj-72-219-2023-supplement-title-page.pdf](#)
- [supplement](#)
  - [Supplementary\\_Table\\_S2.xlsx](#)
  - [Supplementary\\_paper\\_1.pdf](#)

The copyright of individual parts of the supplement might differ from the article licence.
